# Supplementary material for: Epidemiology and health outcomes associated with hyperkalemia in a primary care setting in England
Source: Springer Nature journal article supplement (doi:10.1186/s12882-019-1250-0), 2019-03-06

## Additional File 1

**Table S1** Codes used to define adverse events in this analysis

| Outcome                                    | Description                                                                                                                                              | Code   |         |         |
|--------------------------------------------|----------------------------------------------------------------------------------------------------------------------------------------------------------|--------|---------|---------|
|                                            |                                                                                                                                                          | ICD-10 | OPCS-4  | READ    |
| Dialysis                                   | Care involving dialysis                                                                                                                                  | Z49    |         |         |
|                                            | Dependence on renal dialysis                                                                                                                             | Z99.2  |         |         |
|                                            | Extracorporeal dialysis                                                                                                                                  | Z49.1  |         |         |
|                                            | Injury due to failure of sterile precautions during kidney dialysis or other perfusion                                                                   | Y62.2  |         |         |
|                                            | Injury due to foreign object accidentally left in body during kidney dialysis or other perfusion                                                         | Y61.2  |         |         |
|                                            | Injury due to unintentional cut, puncture, perforation, or hemorrhage during kidney dialysis or other perfusion                                          | Y60.2  |         |         |
|                                            | Insertion or removal of peritoneal dialysis catheter                                                                                                     |        | x41.x   |         |
|                                            | Kidney dialysis as the cause of abnormal reaction of the patient, or of later complication, without mention of misadventure at the time of the procedure | Y84.1  |         |         |
|                                            | Mechanical complication of vascular dialysis catheter                                                                                                    | T82.4  |         |         |
|                                            | Other dialysis                                                                                                                                           | Z49.2  |         |         |
|                                            | Placement of apparatus for compensation for renal failure                                                                                                |        | x42.x   |         |
|                                            | Preparatory care for dialysis                                                                                                                            | Z49.0  |         |         |
|                                            | Renal dialysis                                                                                                                                           |        | x40.x   |         |
|                                            | Peritoneal dialysis sample                                                                                                                               |        |         | 4I29.00 |
|                                            | Compensation for renal failure                                                                                                                           |        |         | 7L1A.00 |
|                                            | Dialysis for renal failure                                                                                                                               |        |         | 7L1A.11 |
|                                            | Renal dialysis                                                                                                                                           |        |         | 7L1A000 |
|                                            | Thomas intravascular shunt for dialysis                                                                                                                  |        |         | 7L1A011 |
|                                            | Peritoneal dialysis                                                                                                                                      |        |         | 7L1A100 |
|                                            | Hemodialysis NEC                                                                                                                                         |        |         | 7L1A200 |
|                                            | Hemofiltration                                                                                                                                           |        |         | 7L1A300 |
|                                            | Automated peritoneal dialysis                                                                                                                            |        |         | 7L1A400 |
|                                            | Continuous ambulatory peritoneal dialysis                                                                                                                |        |         | 7L1A500 |
|                                            | Peritoneal dialysis NEC                                                                                                                                  |        |         | 7L1A600 |
|                                            | Hemoperfusion                                                                                                                                            |        |         | 7L1A700 |
|                                            | Other specified compensation for renal failure                                                                                                           |        |         | 7L1Ay00 |
|                                            | Compensation for renal failure NOS                                                                                                                       |        |         | 7L1Az00 |
|                                            | Extracorporeal albumin hemodialysis                                                                                                                      |        |         | 7L1f000 |
|                                            | [X] Peritoneal dialysis associated peritonitis                                                                                                           |        |         | SP05613 |
|                                            | Kidney dialysis with complication, without blame                                                                                                         |        |         | TB11.00 |
|                                            | Renal dialysis with complication, without blame                                                                                                          |        |         | TB11.11 |
|                                            | [V] Renal dialysis status                                                                                                                                |        |         | ZV45100 |
|                                            | [V] Aftercare involving intermittent dialysis                                                                                                            |        |         | ZV56.00 |
|                                            | [V] Aftercare involving extracorporeal dialysis                                                                                                          |        |         | ZV56000 |
| [V] Aftercare involving renal dialysis NOS |                                                                                                                                                          |        | ZV56011 |         |

| Outcome | Description                                                   | Code   |        |         |
|---------|---------------------------------------------------------------|--------|--------|---------|
|         |                                                               | ICD-10 | OPCS-4 | READ    |
|         | [V] Preparatory care for dialysis                             |        |        | ZV56100 |
|         | [V] Other specified aftercare involving intermittent dialysis |        |        | ZV56y00 |
|         | [V] Aftercare involving peritoneal dialysis                   |        |        | ZV56y11 |
|         | [V] Unspecified aftercare involving intermittent dialysis     |        |        | ZV56z00 |
|         | [X] Other dialysis                                            |        |        | ZVu3G00 |

*ICD-10* International Classification of Diseases, Tenth Revision, *NEC* not elsewhere classified, *NOS* not

otherwise specified, *OPCS-4* OPCS Classification of Interventions and Procedures version 4

**Figure S1** Selection of patients for inclusion in the study.

*CPRD* Clinical Practice Research Datalink, *HES* Hospital Episode Statistics, *HK* hyperkalemia,

$K^+$  potassium, *UTS* up to standard

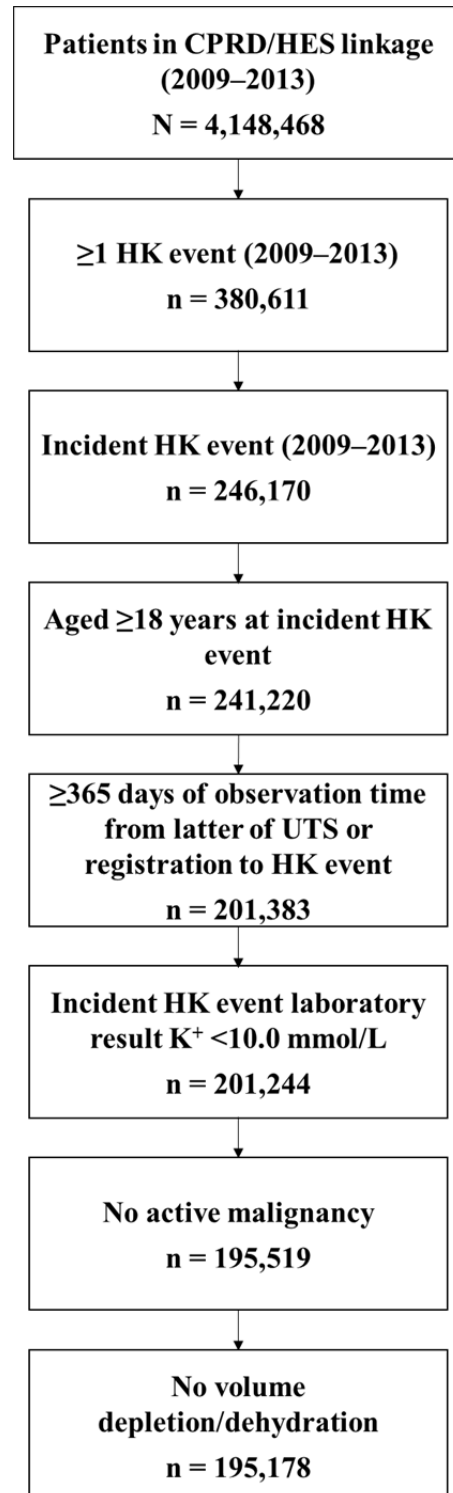

**Figure S2** Hyperkalemia incidence according to age and sex based on (A) serum potassium ( $K^+$ ) 5.0 to  $\leq 5.5$  mmol/L or Clinical Practice Research Datalink diagnosis code in the absence of laboratory results, (B) serum  $K^+ > 5.5$  to  $\leq 6.0$  mmol/L, and (C) serum  $K^+ > 6.0$  mmol/L or Hospital Episode Statistics diagnosis code, regardless of serum  $K^+$  level in the initial hyperkalemic event. Error bars are the 95% confidence interval (CI)

**A**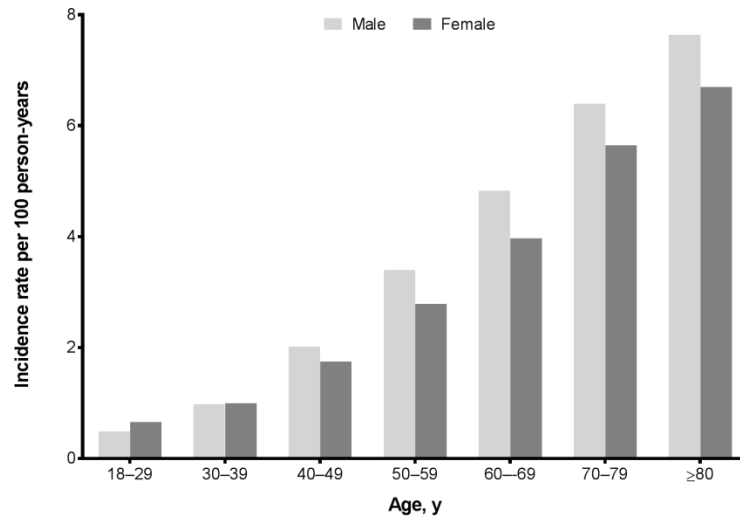**B**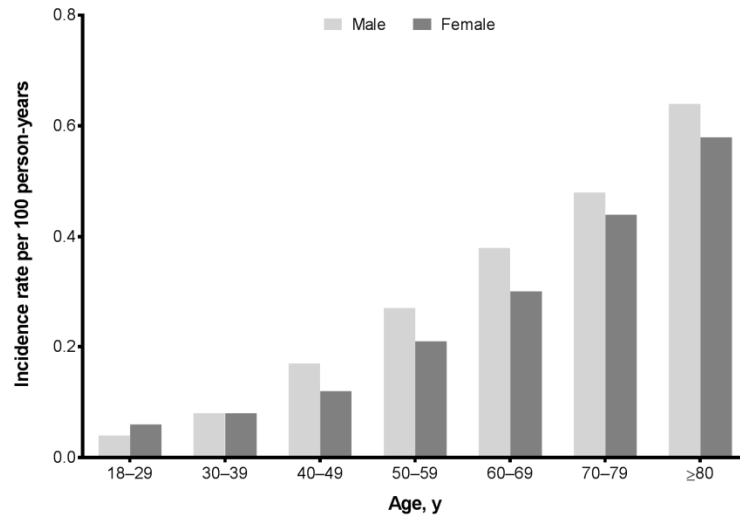**C**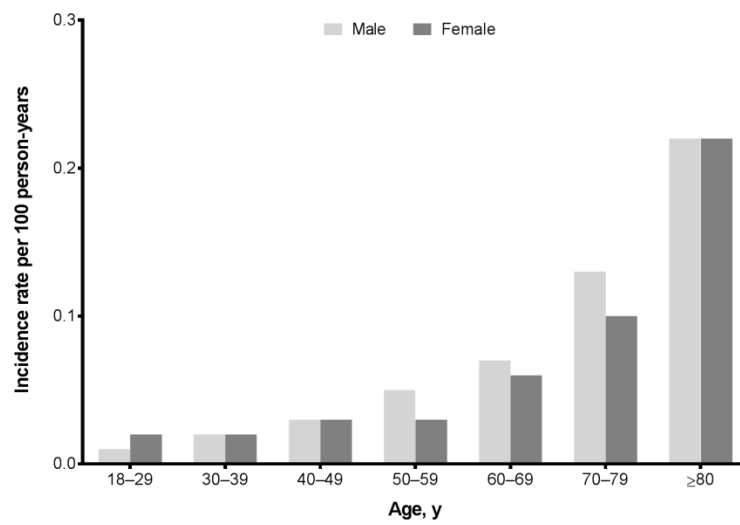

Supplement: MOESM1 [file 16529882]
